# Supplementary material
Source: Research Square preprint supplement (doi:10.21203/rs.3.rs-9112207/v1)
Supplement: Supplementary file 1 [file 372b55a481769664abbc9455.docx]

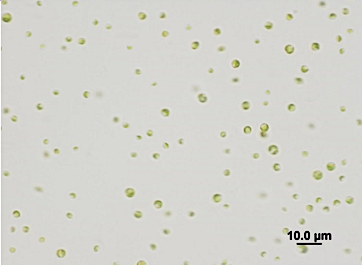


**SB-02**


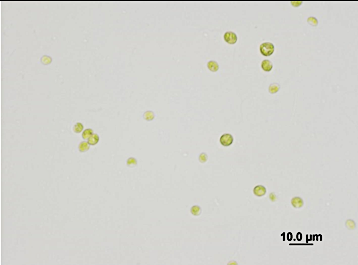


**SB-03**


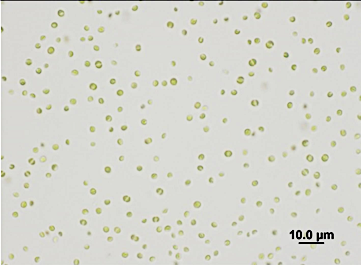


**SB-04**


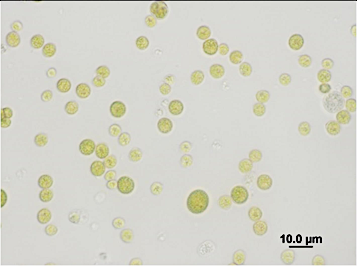


**SB-05**


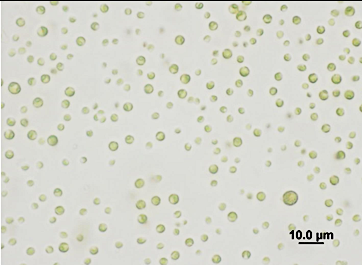


**SB-06**


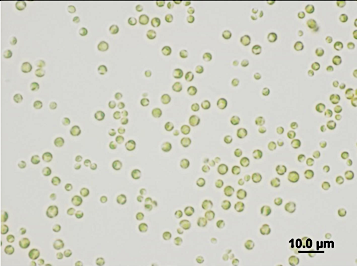


**SB-07**


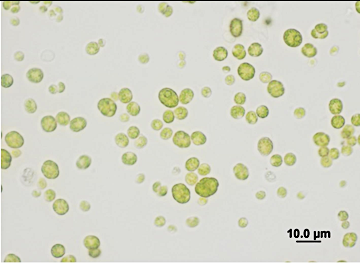


**SB-08**


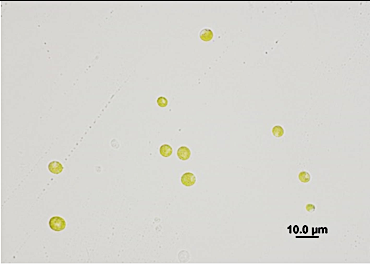


**SB-09**


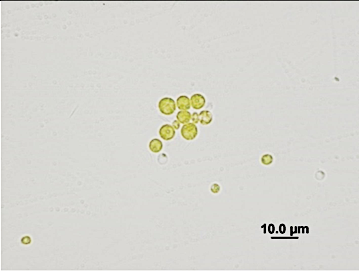


**SB-10**


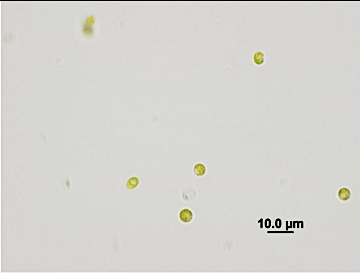


**SB-11**


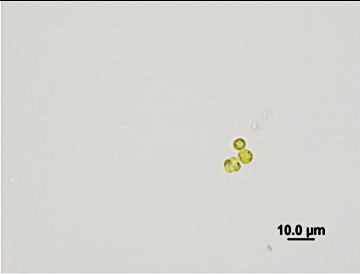


**SB-12**


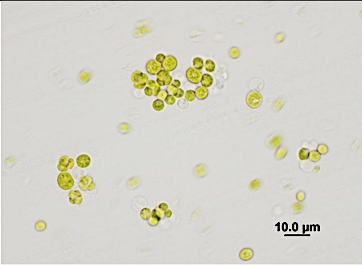


**SB-13**


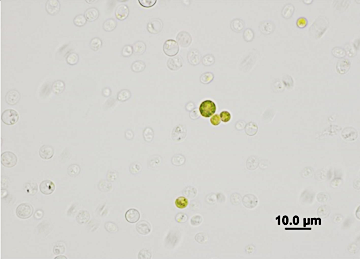


**SB-14**


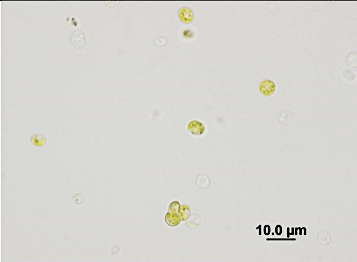


**SB-15**


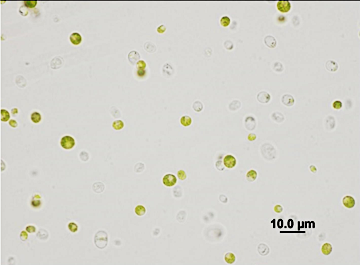


**SB-16**


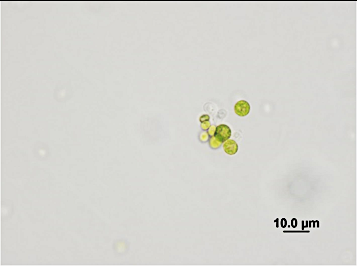


**SB-17**


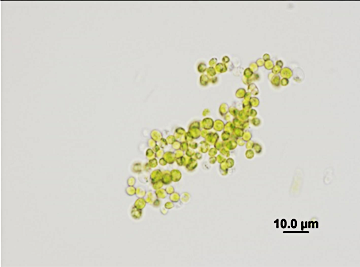


**SB-18**


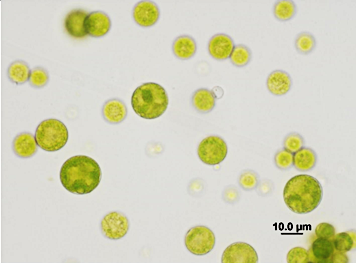


**SB-19**


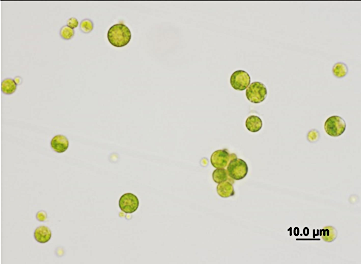


**SB-20**


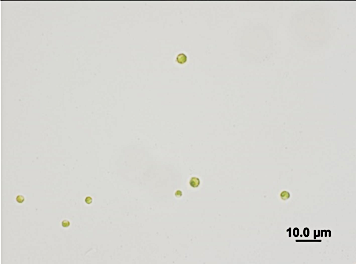


**SB-21**


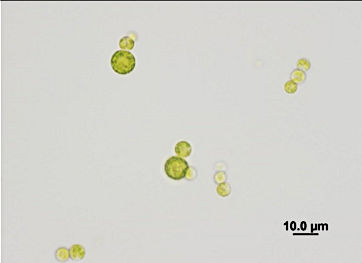


**SB-22**


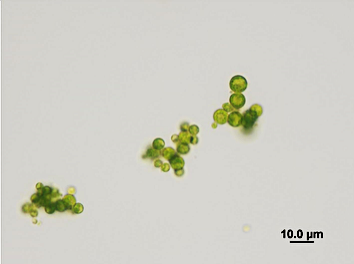


**SB-23**


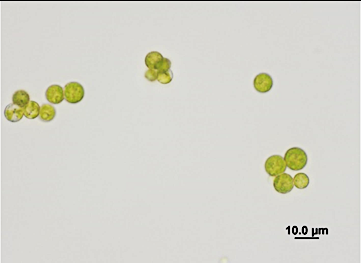


**SB-24**


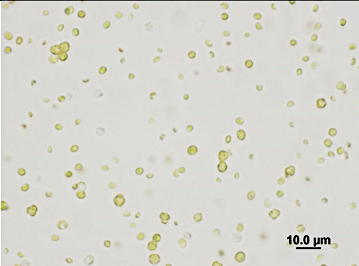


**SB-25**


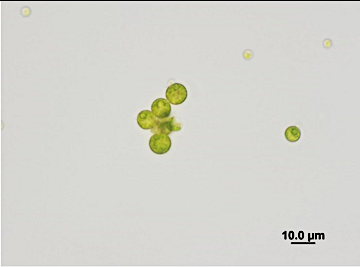


**SB-26**


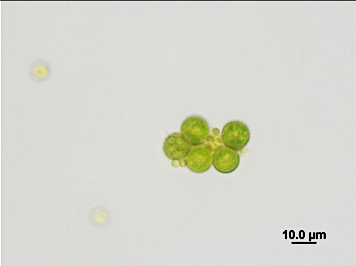


**SB-27**


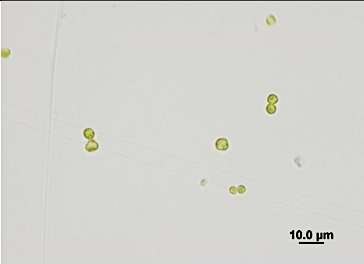


**SB-28**


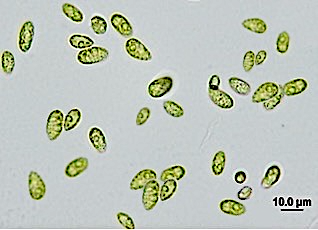


**SB-01**

Figure S1. Microscopic morphology of twenty-eight green algal strains (SB-01-28) isolated from food processing plant wastewater in Phra Nakhon Si Ayutthaya Province, Thailand. under light microscopy (scale bar = 10.0 µm).
